# Supplementary material for: The TRPA1 Channel Amplifies the Oxidative Stress Signal in Melanoma
Source: MDPI journal article supplement (doi:10.3390/cells10113131), 2021-11-11
Supplement: s1 [file s1]

## Supplementary Material

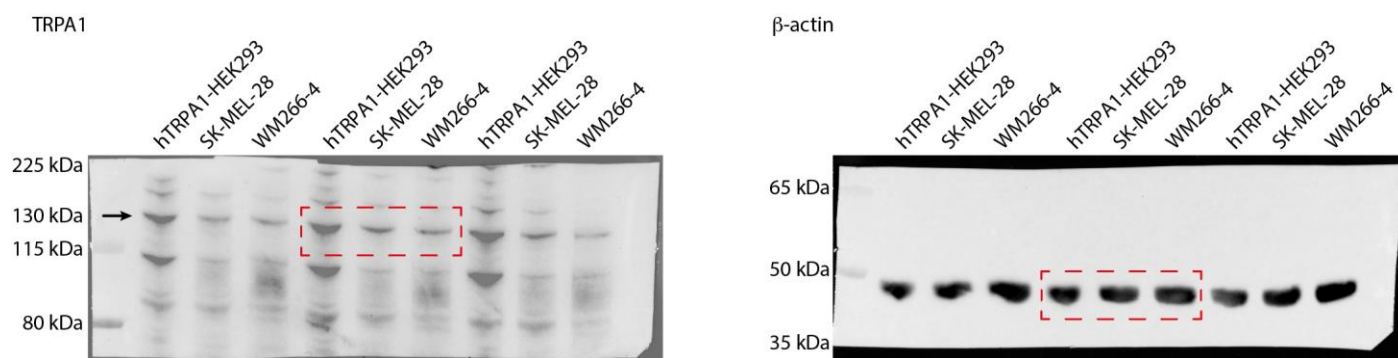

**Figure S1.** The uncropped scan of the blot. The blot area within dashed line box is shown in the Figure 3c.
